# Supplementary material
Source: PubMed Central journal article supplement (PMC6591736)

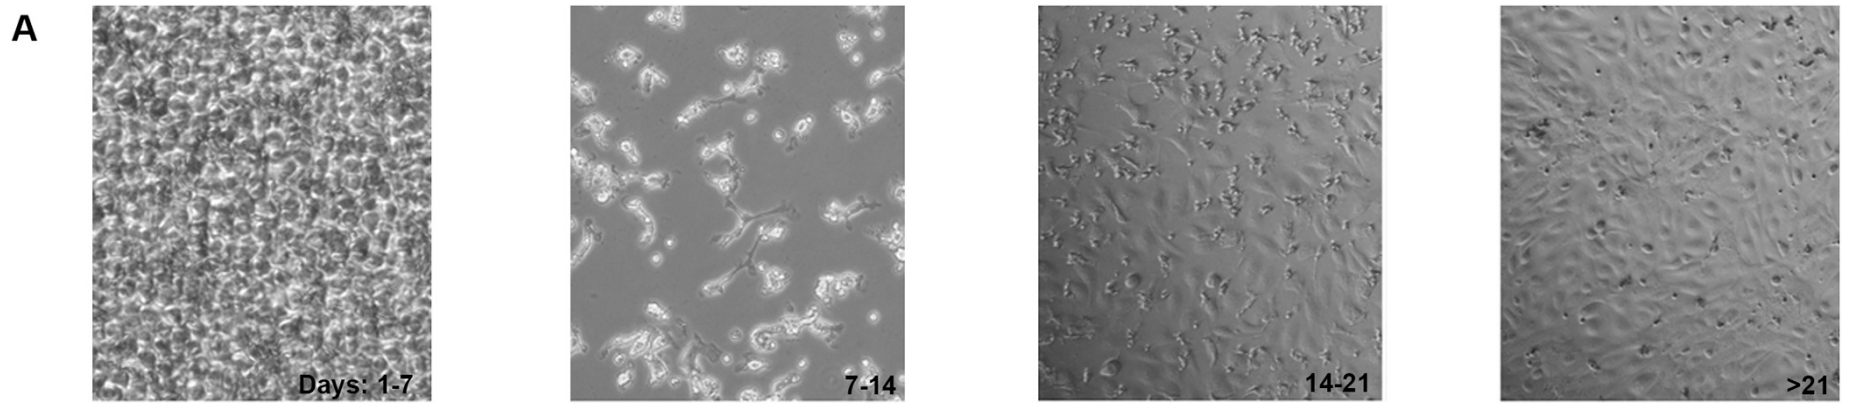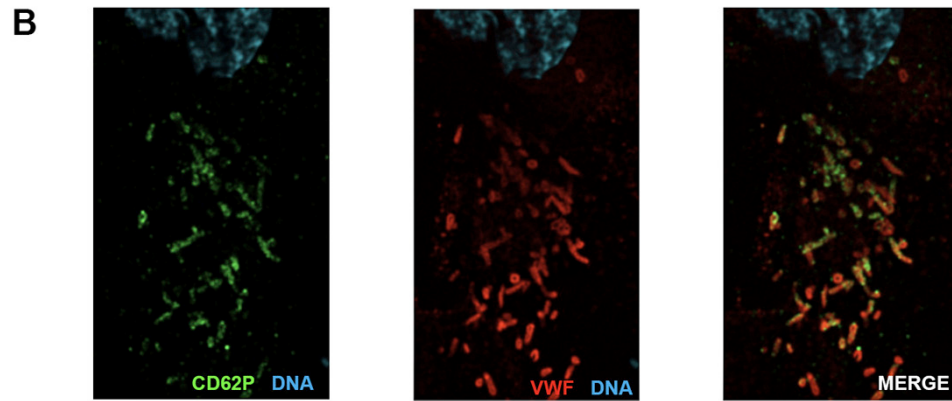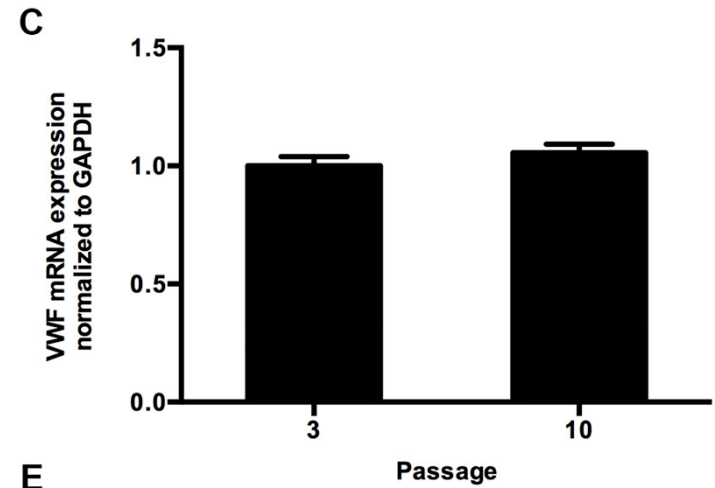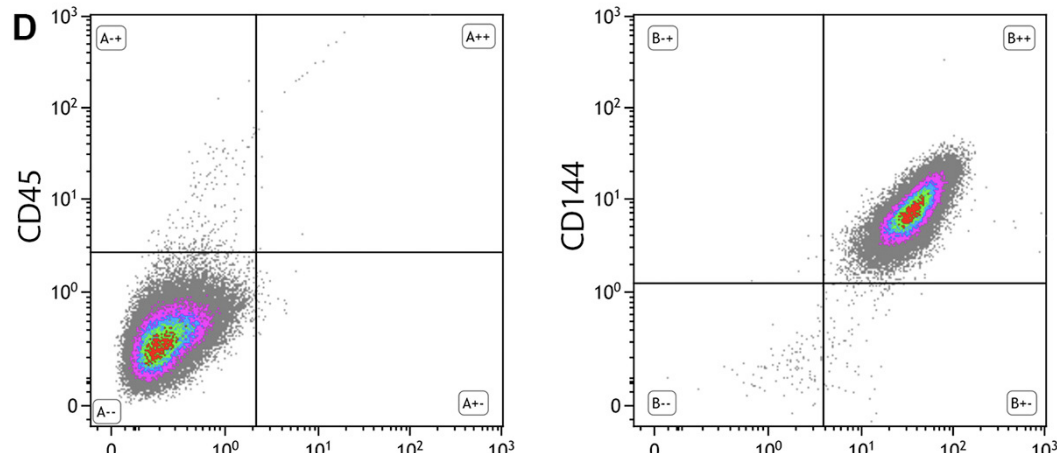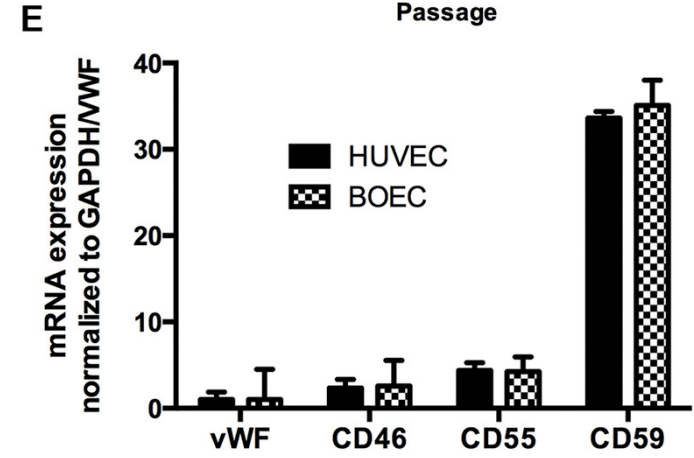

0 10 20 30 40 50 60 70 80 90 100

CD14 CD31

Supplement: NIHMS1024705-supplement-S1.pdf [file NIHMS1024705-supplement-S1.pdf]

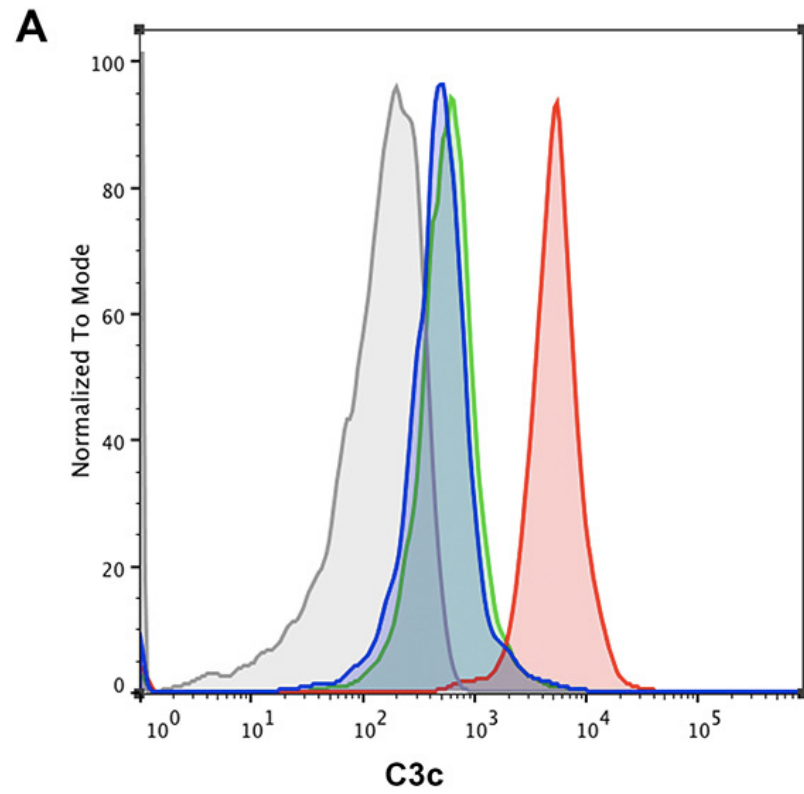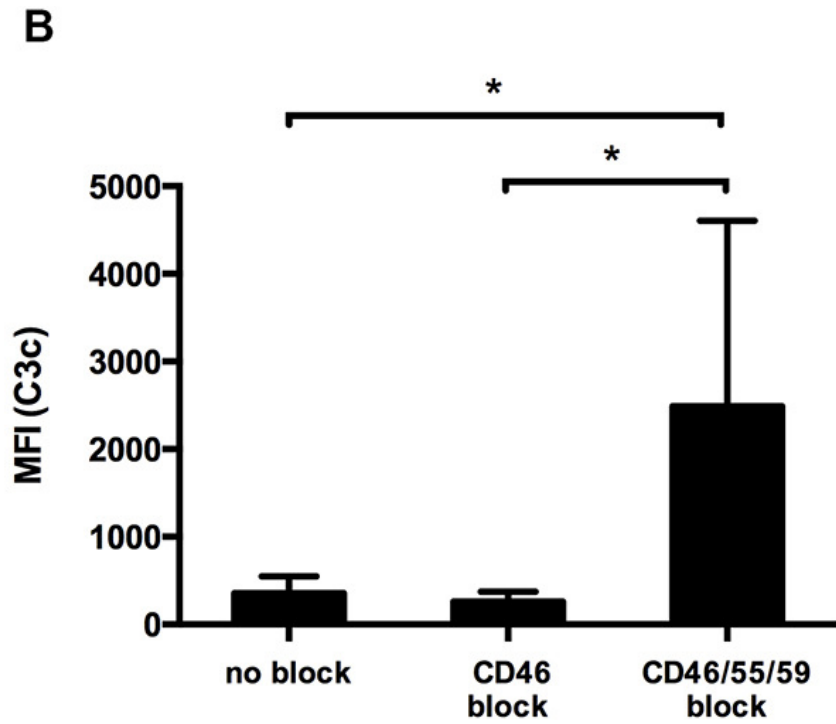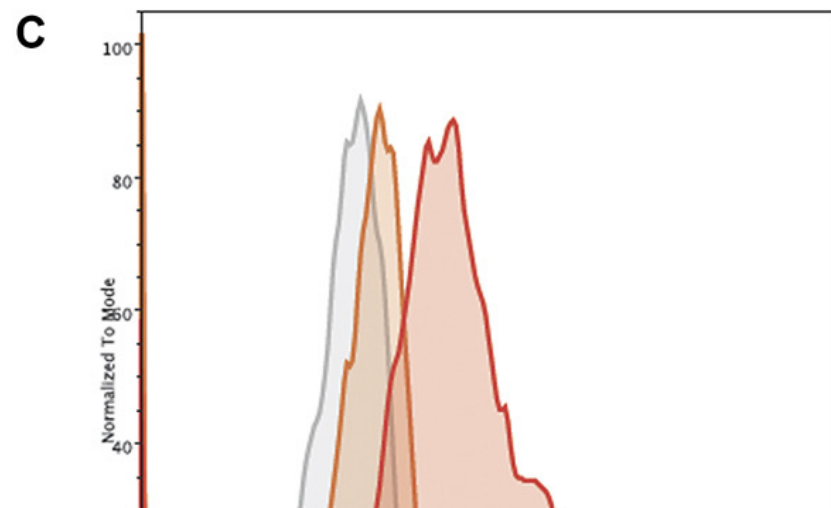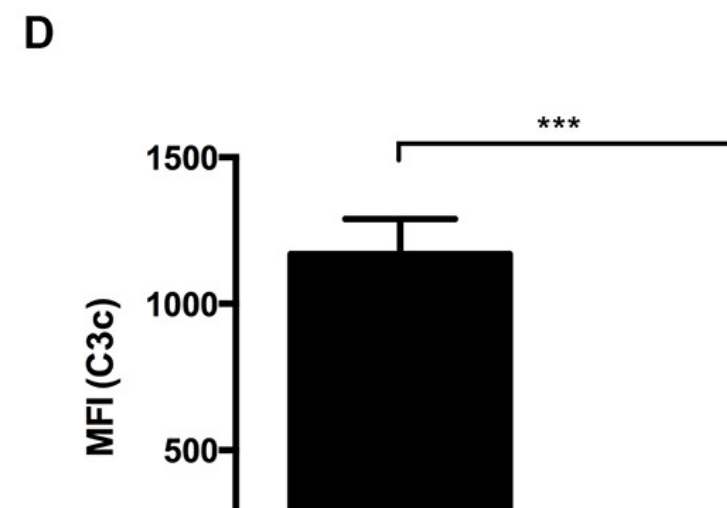

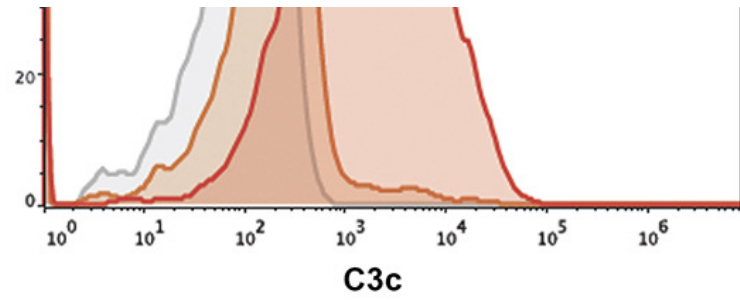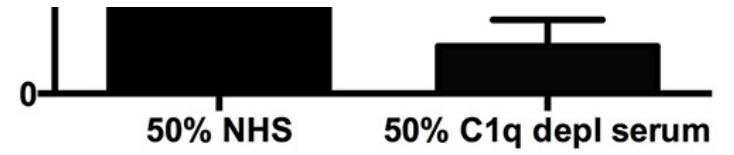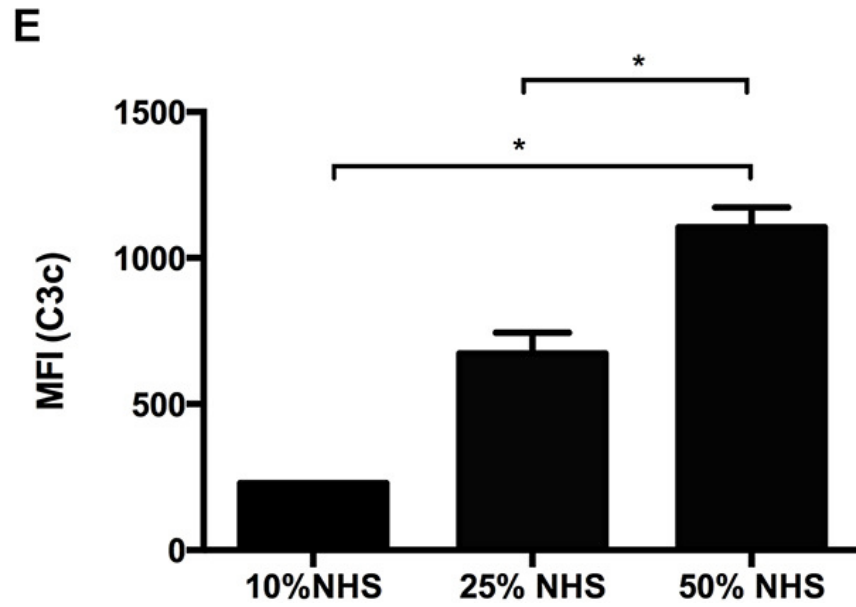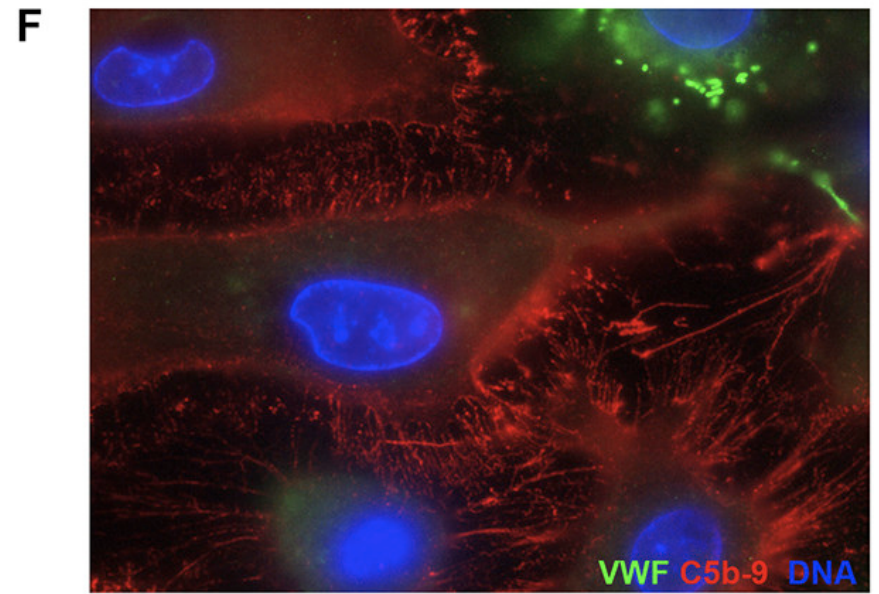

Supplement: NIHMS1024705-supplement-S2.pdf [file NIHMS1024705-supplement-S2.pdf]

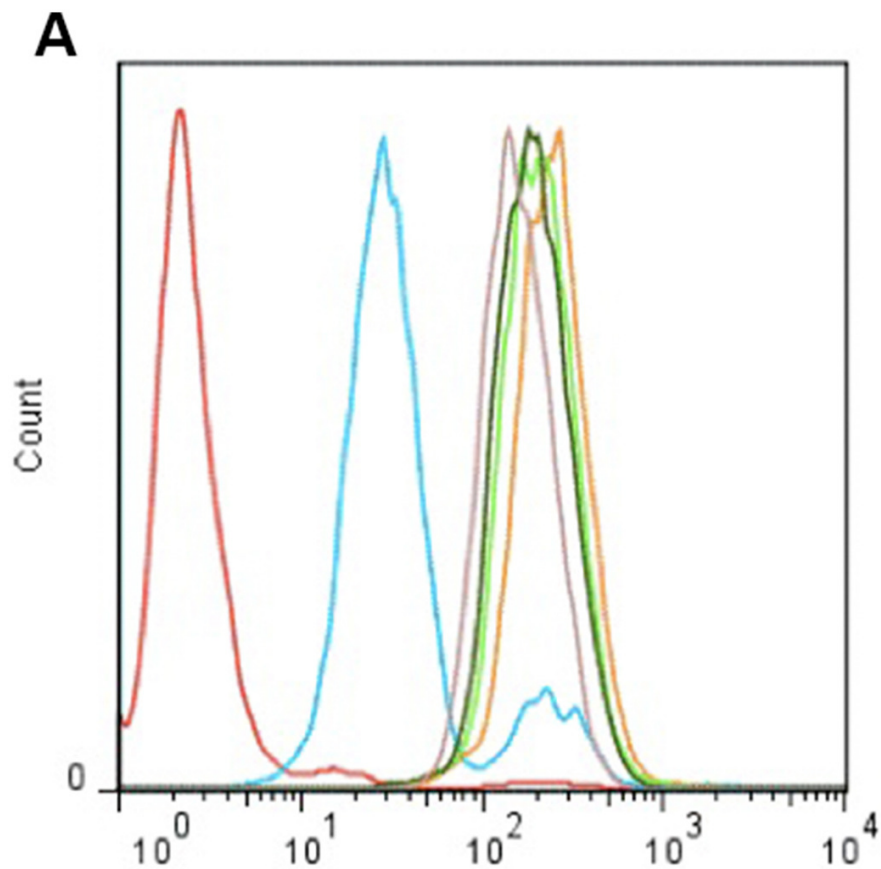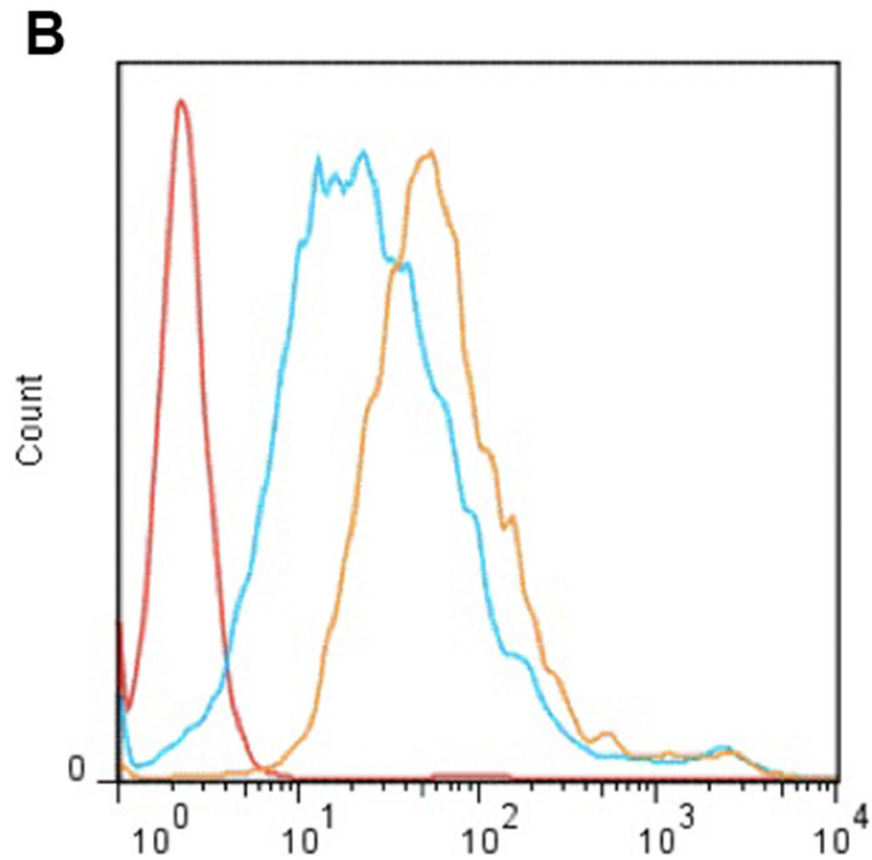

Supplement: NIHMS1024705-supplement-S3.pdf [file NIHMS1024705-supplement-S3.pdf]

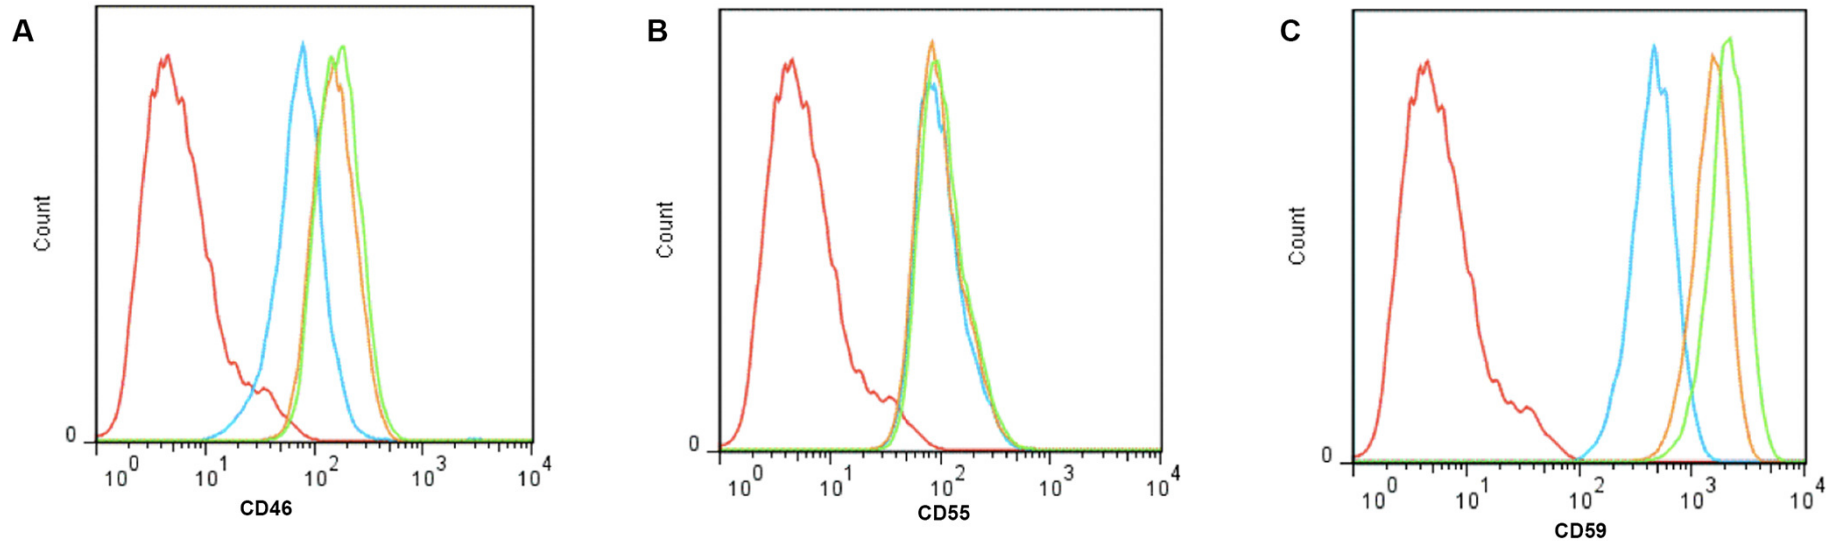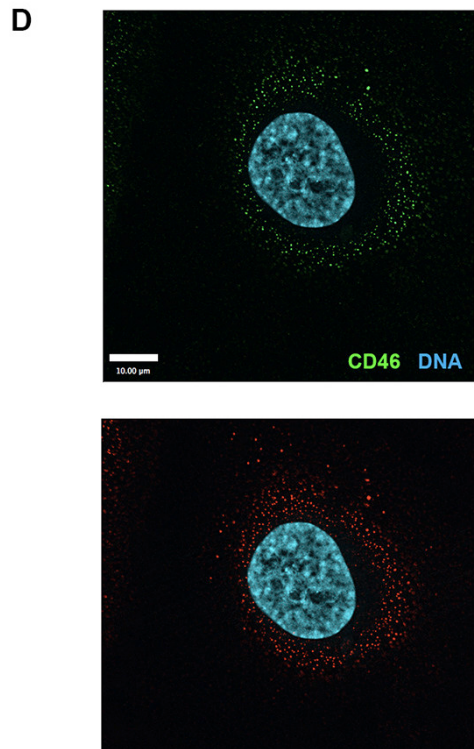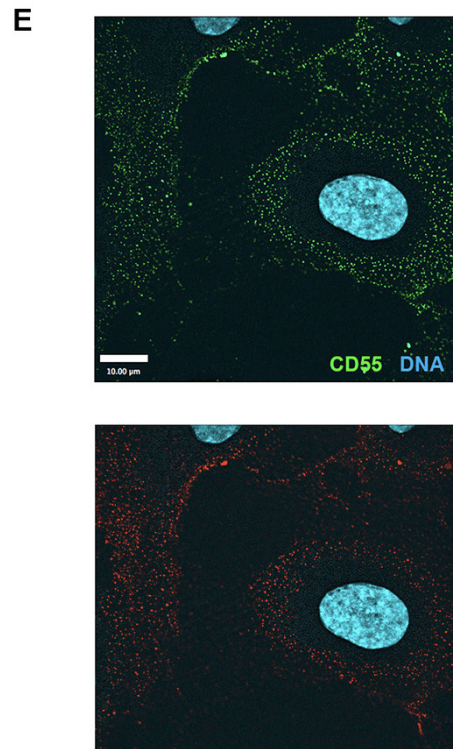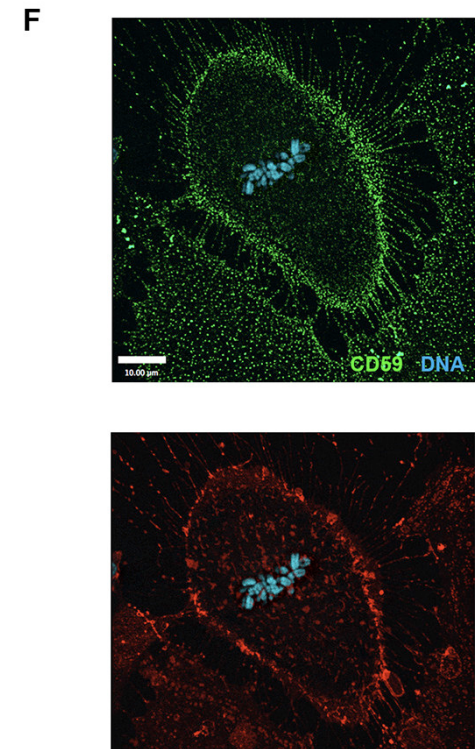

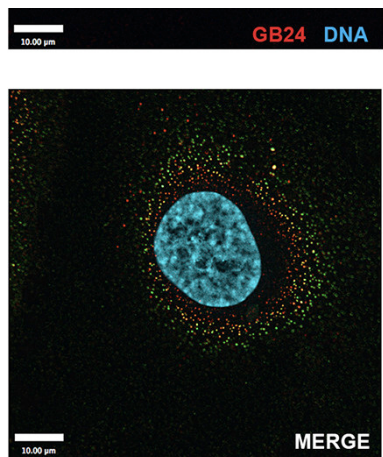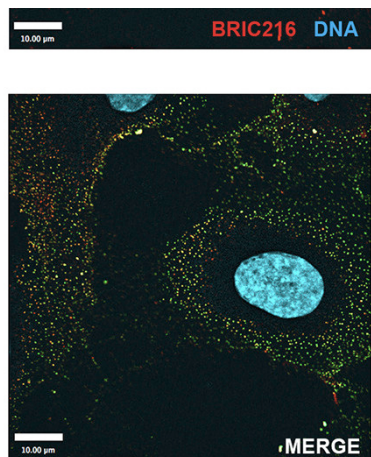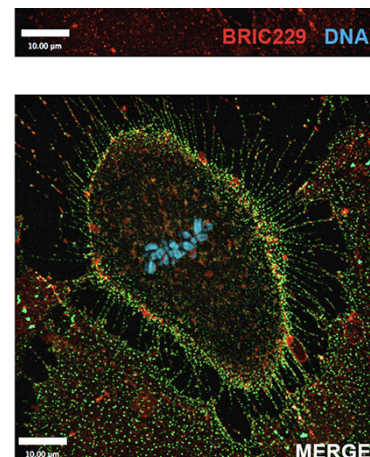

Supplement: NIHMS1024705-supplement-S4.pdf [file NIHMS1024705-supplement-S4.pdf]
